# Supplementary material
Source: PubMed Central journal article supplement (PMC5383631)
Supplement: mmc1.pdf [file mmc1.pdf]

## **Supplemental Information**

### **Systemic AAV8-Mediated Gene Therapy**

#### **Drives Whole-Body Correction of Myotubular**

#### **Myopathy in Dogs**

**David L. Mack, Karine Poulard, Melissa A. Goddard, Virginie Latournerie, Jessica M. Snyder, Robert W. Grange, Matthew R. Elverman, Jérôme Denard, Philippe Veron, Laurine Buscara, Christine Le Bec, Jean-Yves Hogrel, Annie G. Brezovec, Hui Meng, Lin Yang, Fujun Liu, Michael O'Callaghan, Nikhil Gopal, Valerie E. Kelly, Barbara K. Smith, Jennifer L. Strande, Fulvio Mavilio, Alan H. Beggs, Federico Mingozzi, Michael W. Lawlor, Ana Buj-Bello, and Martin K. Childers**

## SUPPLEMENTAL MATERIAL

**Supplemental Movie 1.** Representative phenotype of untreated XLMTM dog approaching euthanasia criteria, 4 months of age.

**Supplemental Movie 2.** Typical play behavior of XLMTM dogs at approximately 4 months of age. The smaller dog was infused with saline at 9 weeks of age; the larger dog received rAAV8-cMTM1 (high dose) at 9 weeks of age. Both dogs are male littermates expressing the p.N155K mutation in *MTM1*.

**Supplemental Movie 3.** Characteristic motor behavior observed during neurological assessment scoring for a saline-infused and rAAV8-cMTM1-infused XLMTM dog. Both dogs are approximately the same age.

**Supplemental Movie 4.** Walking gait following a single infusion of saline or rAAV8-cMTM1 at 10 weeks of age. Videos were taken ~7 weeks after infusion of test articles. Dogs walked along an instrumented carpet that captured spatiotemporal data of footfalls. Differences in gait speed and step length can easily be perceived among the treatment groups.

**Supplemental Figure S1. Study design and assessment sequence.** (A) Overall study design and flow of experimental treatment and assessments. Surviving affected dogs were randomized into treatment groups. Two dogs were excluded from the study due to failure to thrive at birth. Pre-infusion tests preceded and post-infusion tests are listed and described in Methods. (B) Sequence of assessments in an individual dog. Dogs were genotyped shortly after birth. Pre-infusion testing occurred at 9 weeks of age. Dogs were infused with saline or escalating doses rAAV8-cMTM1 at 10 weeks of age followed by repeated tests at the time points illustrated. Muscle biopsies were taken from limb muscles at 9, 15 and 29 weeks of age for analyses of vector copy number, RNA and myotubularin protein. Necropsies were performed at the end of the study in all XLMTM dogs.

**Supplemental Figure S2. Representative pathology of varying XLMTM pathology grades.** H&E stains were used to evaluate myofiber size and morphology, and NADH stains were used to evaluate mitochondrial localization. Grades were assigned as follows: Grade 0 = no XLMTM pathology, Grade 1 = XLMTM pathology in  $\leq 10\%$  of fibers, Grade 2 = XLMTM pathology in 11–30% of fibers, Grade 3 = XLMTM pathology in 31–60% of fibers, Grade 4 = XLMTM pathology in 61–80% of fibers, Grade 5 = XLMTM pathology in 81–100% of fibers. Bar = 100  $\mu\text{m}$ .

**Supplemental Figure S3. AAV8 vector and transgenic protein biodistribution in tissues and organs of XLMTM dogs.** (A) Vector genomes per diploid genome (vg/dg) are shown for the three rAAV8-cMTM1 dosing groups as indicated. Tissues were analyzed from XLMTM dogs at the time of necropsy. Legend: TRI bra = triceps brachii; BI bra = biceps brachii; BI fem = biceps femoris; TA = cranial tibialis; GA = gastrocnemius; SOL = soleus; Paravert = paravertebral muscles; Interc = intercostal; Dia = diaphragm; RV = right ventricle; LV = left ventricle. (B) Transgenic myotubularin expression in various tissues from XLMTM dogs following rAAV8-cMTM1 infusion are

expressed relative to WT levels (1) indicated by a horizontal dashed line. Data shown represent mean +/- SD. (C) Representative western immunoblot of myotubularin and the housekeeping gene, GAPDH.

**Supplemental Figure S4. rAAV8-cMTM1 does not elicit humoral immune responses to myotubularin.** (A) Anti-rAAV8 capsid IgG antibody levels measured by ELISA, values are reported as the sample dilution (1:x) leading to an optical density (OD) above a predetermined binding threshold; (B) IgG antibodies against canine MTM1 transgene product measured by ELISA, results are reported in ng/ml, concentration was determined against a standard curve made of purified canine IgG; (C) Serum neutralizing antibodies against the rAAV8 capsid measured with an *in vitro* transduction inhibition assay; results are reported as the sample dilution (1:x) leading to >50% inhibition of transduction of a reporter vector. Values are reported as average +/- standard deviation.

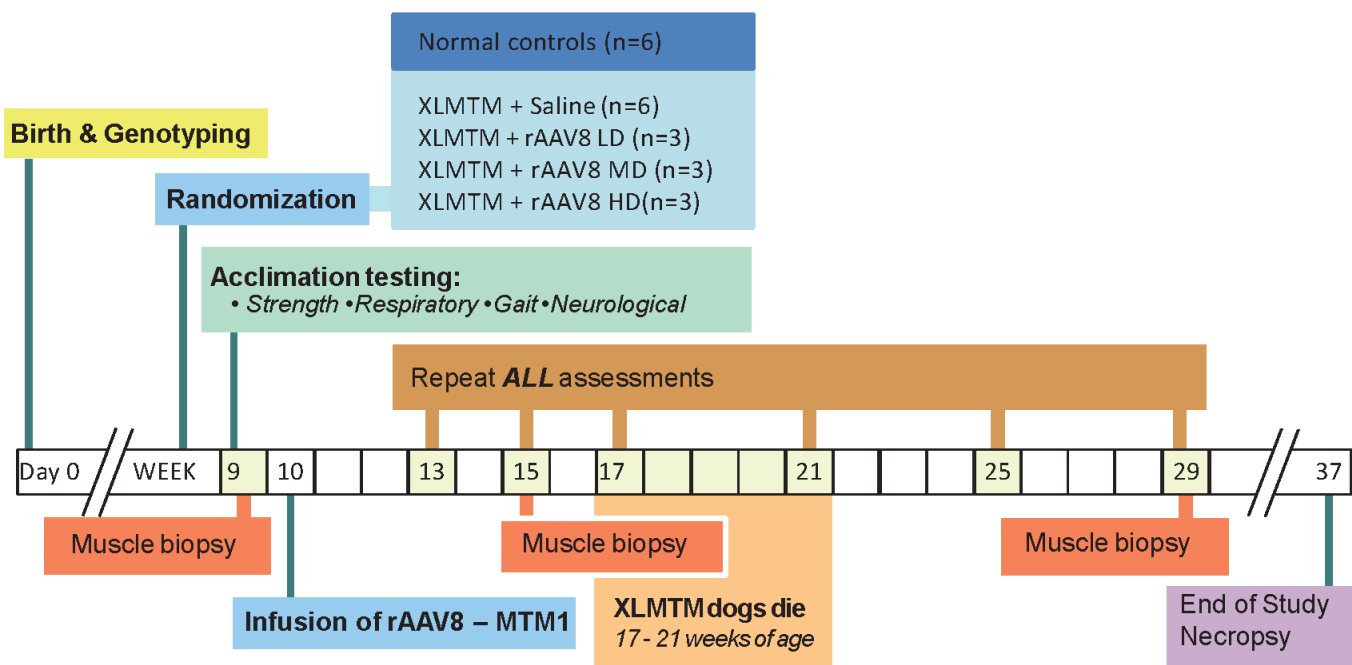

Supplemental Figure 1

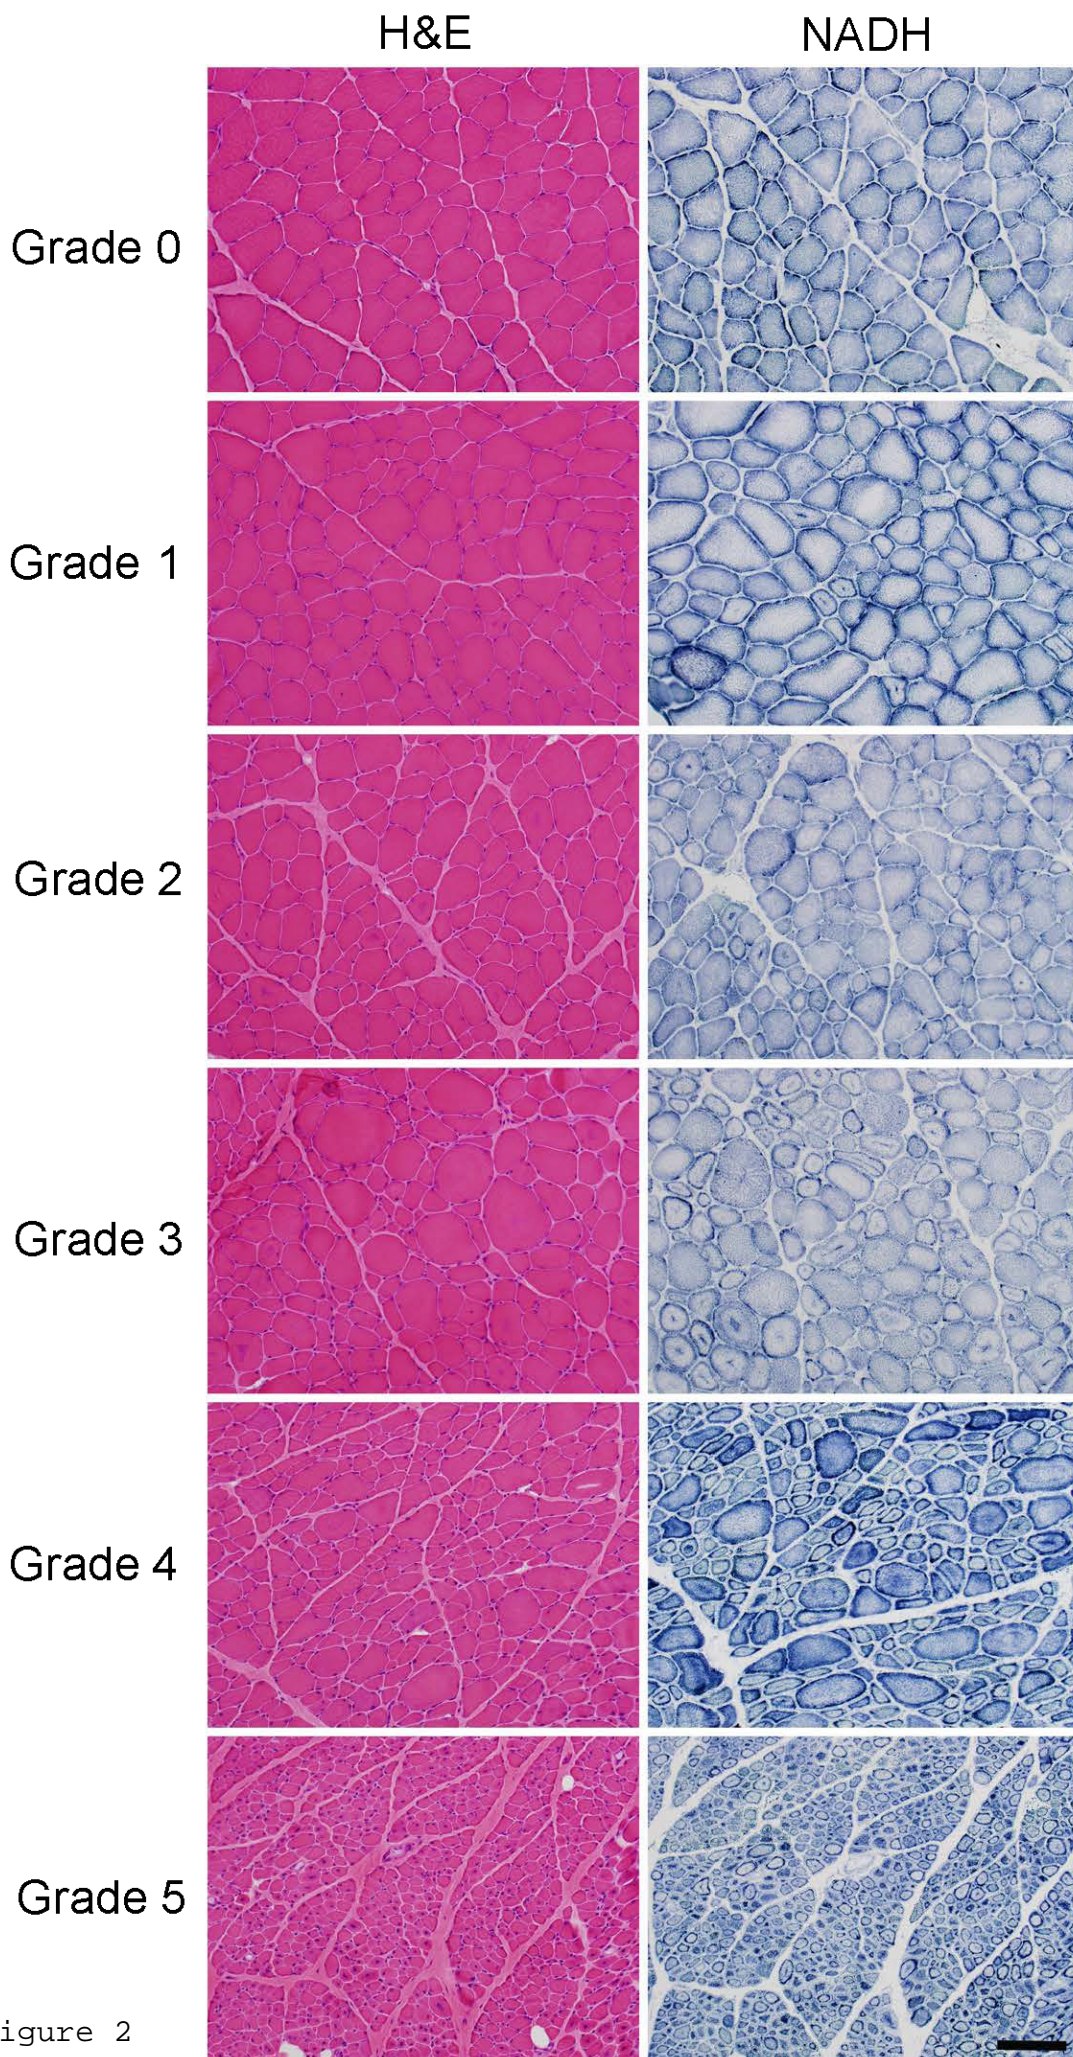

Supplemental Figure 2

### Vector Copy Number

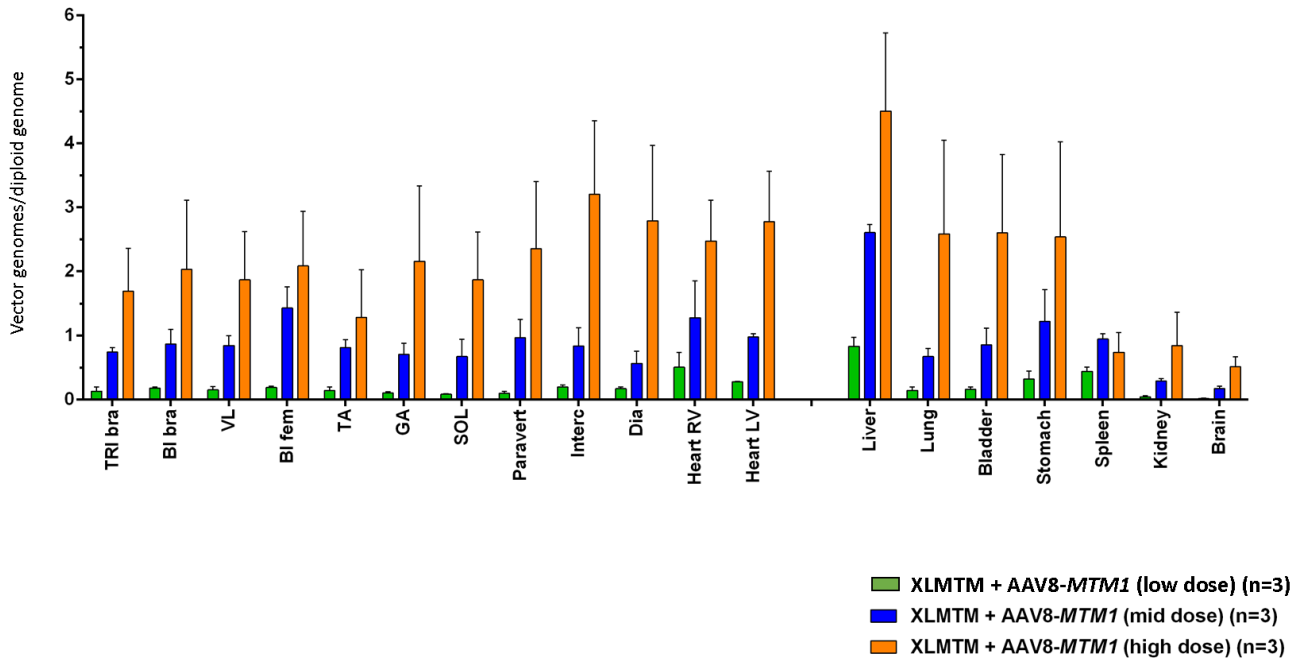

Supplemental Figure 3A

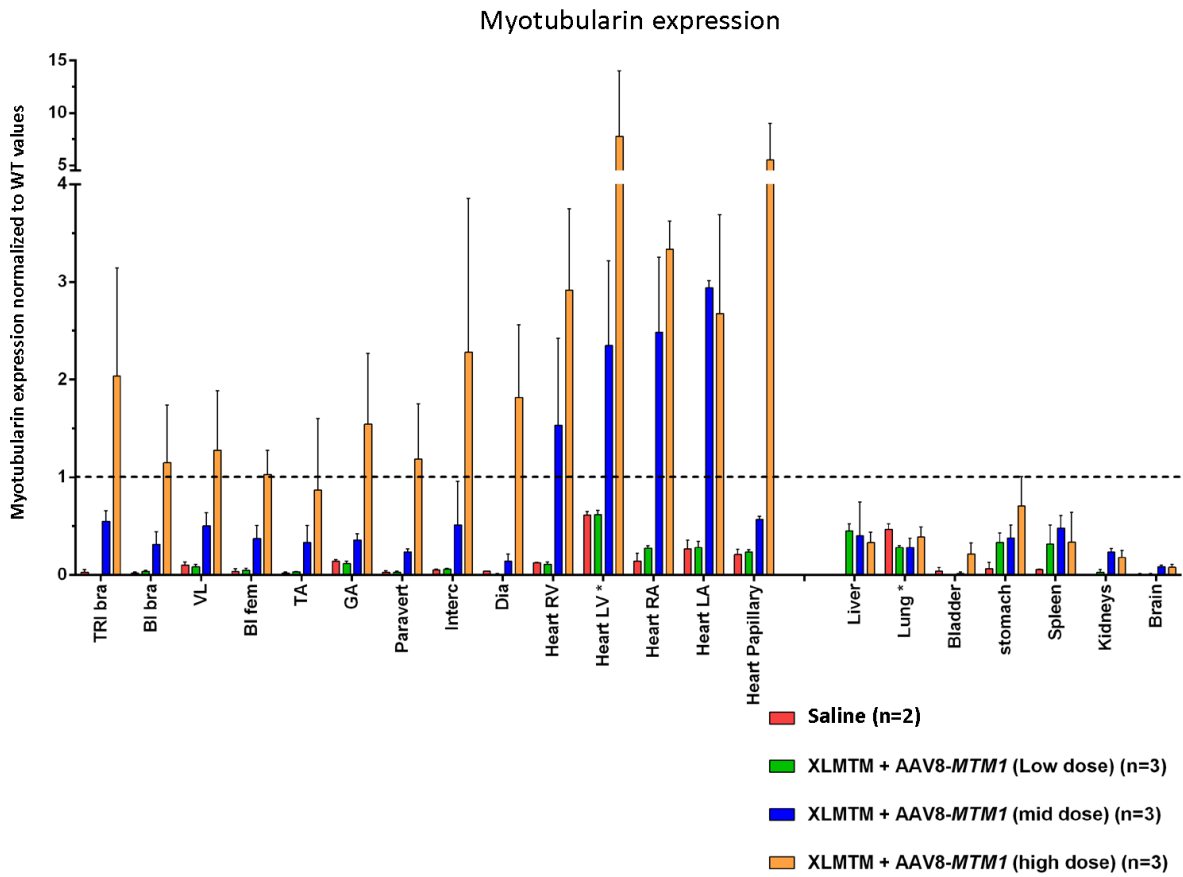

Supplemental Figure 3B

### Triceps Brachii

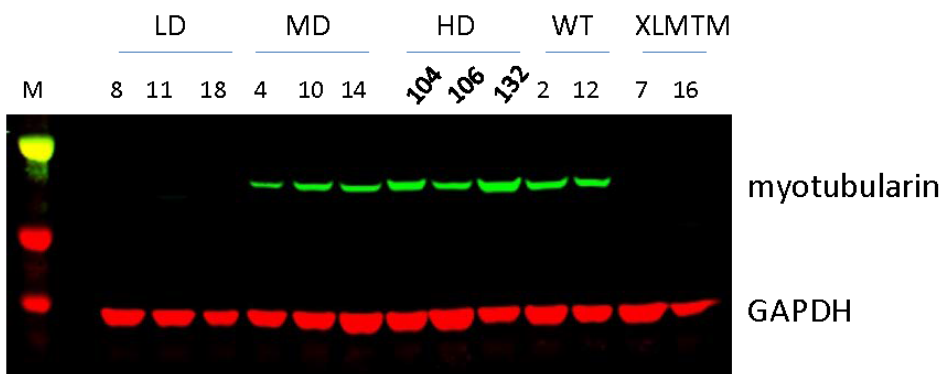

Supplemental Figure 3C



**a**

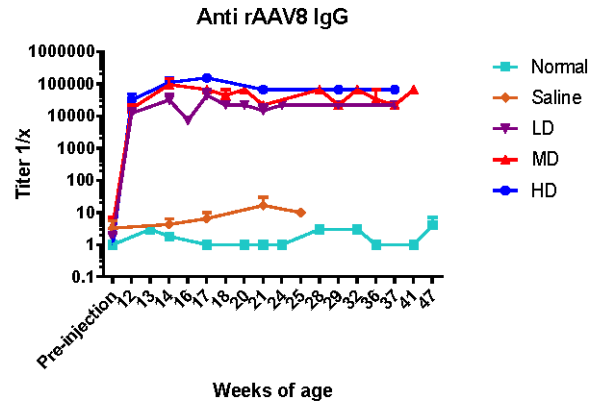

**b**

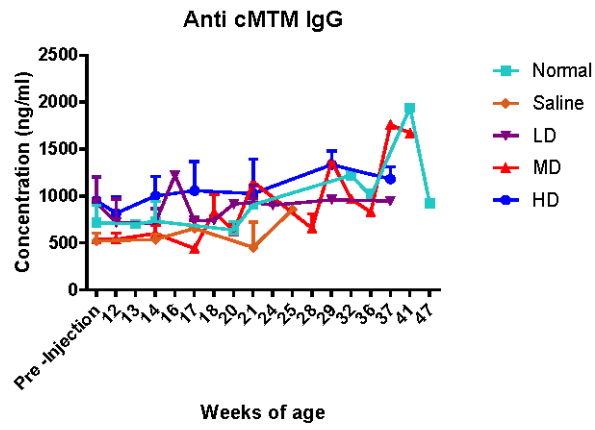

**c**

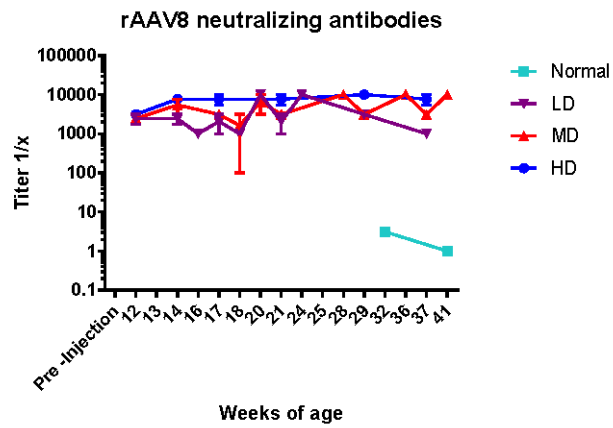

Supplemental Figure 4

**Supplemental Table 1. Demographics of study animals.**

| rAAV8-cMTM1<br>Dose<br>(vg/kg)  | Number of Dogs<br>Males/Females | Number of XLMTM Dogs |         | Number of Normal Control Dogs |         |
|---------------------------------|---------------------------------|----------------------|---------|-------------------------------|---------|
|                                 |                                 | Males                | Females | Males                         | Females |
| Saline only                     | 4/6                             | 1                    | 5       | 3                             | 3       |
| Low Dose<br>$10^{11}$           | 2/1                             | 2                    | 1       | -                             | -       |
| Mid Dose<br>$2 \times 10^{14}$  | 3/0                             | 3                    | -       | -                             | -       |
| High Dose<br>$5 \times 10^{14}$ | 3/0                             | 3                    | -       | -                             | -       |

Supplemental Table 2: Neurological function

| Neurological assessment scores |            |   |            |   |            |   |            |   |            |   |  |
|--------------------------------|------------|---|------------|---|------------|---|------------|---|------------|---|--|
| Age (weeks)                    | Normal     |   | Saline     |   | Low Dose   |   | Mid Dose   |   | High Dose  |   |  |
|                                | Mean ± SEM |   | Mean ± SEM |   | Mean ± SEM |   | Mean ± SEM |   | Mean ± SEM |   |  |
| Pre-Infusion                   | 9.8 ± 0.2  |   | 8.6 ± 0.4  |   | 7.7 ± 0.3  |   | 8.3 ± 0.3  |   | 8.7 ± 0.7  |   |  |
| 17                             | 10 ± 0.0   |   | 5.6 ± 0.8  |   | 6.7 ± 0.7  |   | 8.7 ± 0.3  |   | 9.3 ± 0.7  |   |  |
| 37                             | 10 ± 0.0   |   | -          |   | -          |   | 8.0 ± 0.0  |   | 9.3 ± 0.7  |   |  |
| Composite reflex scores        |            |   |            |   |            |   |            |   |            |   |  |
|                                | Mean ± SD  | N |  |
| Pre-Infusion                   | 1.9 ± 0.1  | 6 | 1.4 ± 0.1  | 5 | 1.3 ± 0.0  | 3 | 1.4 ± 0.1  | 3 | ND         | 3 |  |
| 13                             | 2.0 ± 0.0  | 6 | 1.3 ± 0.1  | 5 | 1.3 ± 0.1  | 3 | 1.7 ± 0.0  | 3 | 1.4 ± 0.1  | 3 |  |
| 15                             | 1.9 ± 0.1  | 6 | 1.2 ± 0.1  | 5 | 1.2 ± 0.3  | 3 | 1.7 ± 0.1  | 3 | 1.9 ± 0.0  | 3 |  |
| 17                             | 2.0 ± 0.0  | 6 | 1.0 ± 0.1  | 5 | 1.4 ± 0.1  | 3 | 1.8 ± 0.1  | 3 | 2.0 ± 0.0  | 3 |  |
| 21                             | 2.0 ± 0.0  | 6 | 0.9 ± 0.3  | 2 | 1.1 ± 0.3  | 3 | 1.8 ± 0.1  | 3 | 2.0 ± 0.0  | 3 |  |
| 25                             | 2.0 ± 0.0  | 6 | 1.2 ± 0.0  | 1 | 1.1 ± 0.4  | 2 | 1.9 ± 0.1  | 3 | 2.0 ± 0.0  | 3 |  |
| 29                             | 2.0 ± 0.0  | 6 |            |   | 1.6 ± 0.0  | 1 | 1.9 ± 0.1  | 3 | 2.0 ± 0.0  | 3 |  |
| 33                             | 2.1 ± 0.0  | 6 |            |   |            |   | 2.0 ± 0.1  | 3 | 2.0 ± 0.0  | 3 |  |
| 37                             | 2.0 ± 0.1  | 6 |            |   |            |   | 1.9 ± 0.1  | 2 | 2.0 ± 0.1  | 3 |  |

Supplemental Table 3: Limb torque (N·m/kg x 10<sup>-2</sup>)

| Forelimb extension torque (N·m/kg x 10 <sup>-2</sup> ) |            |   |            |   |            |   |            |   |            |   |
|--------------------------------------------------------|------------|---|------------|---|------------|---|------------|---|------------|---|
| Age (weeks)                                            | Normal     |   | Saline     |   | Low Dose   |   | Mid Dose   |   | High Dose  |   |
|                                                        | Mean ± SD  | N |
| Pre-Infusion                                           | 2.1 ± 0.4  | 6 | 1.9 ± 0.3  | 6 | 1.3 ± 0.0  | 3 | 1.0 ± 0.1  | 3 | 2.3 ± 0.5  | 3 |
| 13                                                     | 3.4 ± 0.3  | 6 | 1.3 ± 0.1  | 5 | 2.2 ± 0.2  | 3 | 1.9 ± 0.2  | 3 | 2.1 ± 0.3  | 3 |
| 15                                                     | 3.1 ± 0.3  | 6 | 1.1 ± 0.2  | 5 | 1.2 ± 0.4  | 3 | 2.0 ± 0.3  | 3 | 2.1 ± 0.2  | 3 |
| 17                                                     | 3.9 ± 0.3  | 6 | 1.1 ± 0.2  | 5 | 1.6 ± 0.1  | 3 | 2.4 ± 0.3  | 3 | 3.1 ± 0.7  | 3 |
| 21                                                     | 3.5 ± 0.3  | 6 | 1.4 ± 0.1  | 2 | 1.1 ± 0.5  | 3 | 2.6 ± 0.4  | 3 | 2.4 ± 0.4  | 3 |
| 25                                                     | 4.4 ± 0.3  | 6 | 1.0 ± 0.0  | 1 | 2.1 ± 0.0  | 1 | 3.0 ± 0.7  | 3 | 2.9 ± 0.6  | 3 |
| 29                                                     | 4.8 ± 0.4  | 6 |            |   | 2.2 ± 0.0  | 1 | 2.9 ± 0.2  | 3 | 3.0 ± 0.3  | 3 |
| 33                                                     | 4.4 ± 0.3  | 6 |            |   | 1.8 ± 0.0  | 1 | 4.0 ± 0.5  | 3 | 2.6 ± 0.5  | 3 |
| 37                                                     | 5.1 ± 0.2  | 6 |            |   | 0.5 ± 0.0  | 1 | 3.9 ± 0.6  | 3 | 3.3 ± 0.4  | 3 |
| Forelimb flexion torque (N·m/kg x 10 <sup>-2</sup> )   |            |   |            |   |            |   |            |   |            |   |
| Pre-Infusion                                           | 9.7 ± 0.7  | 6 | 11.5 ± 1.6 | 6 | 12.3 ± 2.1 | 3 | 9.5 ± 0.6  | 3 | 7.6 ± 2.3  | 3 |
| 13                                                     | 11.8 ± 1.1 | 6 | 11.4 ± 0.8 | 5 | 13.0 ± 2.9 | 3 | 13.0 ± 0.3 | 3 | 10.2 ± 0.7 | 3 |
| 15                                                     | 10.3 ± 1.1 | 6 | 10.7 ± 1.2 | 5 | 11.3 ± 2.5 | 3 | 14.3 ± 0.4 | 3 | 12.4 ± 2.1 | 3 |
| 17                                                     | 13.2 ± 0.8 | 6 | 10.3 ± 0.8 | 5 | 11.8 ± 1.6 | 3 | 15.0 ± 0.6 | 3 | 12.8 ± 0.1 | 3 |
| 21                                                     | 15.7 ± 2.1 | 6 | 19.5 ± 0.1 | 2 | 11.8 ± 2.7 | 3 | 13.9 ± 0.6 | 3 | 12.4 ± 0.5 | 3 |
| 25                                                     | 15.3 ± 1.4 | 6 | 12.6 ± 0.0 | 1 | 11.2 ± 0.0 | 1 | 16.2 ± 0.4 | 3 | 11.8 ± 1.3 | 3 |
| 29                                                     | 21.9 ± 1.8 | 6 |            |   | 20.6 ± 0.0 | 1 | 25.1 ± 5.2 | 3 | 16.6 ± 4.7 | 3 |
| 33                                                     | 18.1 ± 3.1 | 6 |            |   | 1.7 ± 0.0  | 1 | 24.1 ± 5.1 | 3 | 10.8 ± 1.9 | 3 |
| 37                                                     | 22.6 ± 3.2 | 6 |            |   | 6.8 ± 0.0  | 1 | 23.6 ± 4.3 | 3 | 14.4 ± 1.8 | 3 |
| Hindlimb extension torque (N·m/kg x 10 <sup>-2</sup> ) |            |   |            |   |            |   |            |   |            |   |
| Pre-infusion                                           | 23.0 ± 4.0 | 6 | 23.3 ± 0.7 | 6 | 25.6 ± 1.8 | 3 | 16.9 ± 3.6 | 3 | 24.9 ± 5.3 | 3 |
| 13                                                     | 29.6 ± 5.5 | 6 | 24.9 ± 5.2 | 5 | 27.8 ± 8.7 | 3 | 17.3 ± 1.1 | 3 | 35.7 ± 6.5 | 3 |
| 15                                                     | 21.3 ± 3.8 | 6 | 22.7 ± 5.9 | 5 | 25.5 ± 8.2 | 3 | 20.5 ± 3.9 | 3 | 32.9 ± 1.2 | 3 |
| 17                                                     | 30.5 ± 4.4 | 6 | 24.1 ± 4.1 | 5 | 29.1 ± 7.1 | 3 | 27.9 ± 2.3 | 3 | 37.1 ± 1.1 | 3 |
| 21                                                     | 39.1 ± 6.2 | 6 | 19.0 ± 3.6 | 2 | 23.3 ± 6.0 | 3 | 39.3 ± 3.0 | 3 | 35.8 ± 3.7 | 3 |
| 25                                                     | 45.4 ± 6.3 | 6 | 12.6 ± 0.0 | 1 | 45.4 ± 0.0 | 1 | 43.8 ± 4.8 | 3 | 39.9 ± 1.2 | 3 |
| 29                                                     | 48.1 ± 3.9 | 6 |            |   | 19.7 ± 0.0 | 1 | 51.8 ± 3.0 | 3 | 42.6 ± 1.4 | 3 |
| 33                                                     | 54.7 ± 3.3 | 6 |            |   | 27.1 ± 0.0 | 1 | 52.5 ± 3.8 | 3 | 43.5 ± 3.2 | 3 |
| 37                                                     | 53.3 ± 4.7 | 6 |            |   | 23.4 ± 0.0 | 1 | 56.9 ± 4.6 | 3 | 43.6 ± 4.1 | 3 |
| Hindlimb flexion torque (N·m/kg x 10 <sup>-2</sup> )   |            |   |            |   |            |   |            |   |            |   |
| Pre-Infusion                                           | 9.1 ± 1.1  | 6 | 6.3 ± 0.7  | 6 | 3.9 ± 0.6  | 3 | 4.3 ± 1.0  | 3 | 4.7 ± 1.5  | 3 |
| 13                                                     | 9.7 ± 1.2  | 6 | 5.3 ± 1.1  | 5 | 6.7 ± 2.3  | 3 | 6.0 ± 1.4  | 3 | 9.0 ± 1.6  | 3 |
| 15                                                     | 11.0 ± 0.5 | 6 | 5.3 ± 1.4  | 5 | 7.5 ± 1.6  | 3 | 7.8 ± 0.7  | 3 | 9.4 ± 0.7  | 3 |
| 17                                                     | 14.3 ± 1.5 | 6 | 5.1 ± 1.2  | 5 | 5.9 ± 2.7  | 3 | 12.8 ± 2.6 | 3 | 11.9 ± 1.1 | 3 |
| 21                                                     | 18.2 ± 1.1 | 6 | 4.7 ± 0.3  | 2 | 7.8 ± 2.6  | 3 | 14.7 ± 2.1 | 3 | 11.2 ± 0.7 | 3 |
| 25                                                     | 20.6 ± 1.9 | 6 | 5.0 ± 0.0  | 1 | 16.5 ± 0.0 | 1 | 17.6 ± 2.6 | 3 | 15.1 ± 0.6 | 3 |
| 29                                                     | 22.1 ± 1.7 | 6 |            |   | 11.6 ± 0.0 | 1 | 18.0 ± 2.5 | 3 | 12.9 ± 1.6 | 3 |
| 33                                                     | 22.4 ± 3.9 | 6 |            |   | 13.6 ± 0.0 | 1 | 17.9 ± 4.0 | 3 | 16.9 ± 1.4 | 3 |
| 37                                                     | 23.3 ± 1.5 | 6 |            |   | 8.3 ± 0.0  | 1 | 19.8 ± 2.6 | 3 | 14.9 ± 2.7 | 3 |

Supplemental Table 4: Walking gait and peak inspiratory flow velocities (mL/s)

| Gait speed (cm/s)                       |            |   |            |   |            |   |            |   |            |   |
|-----------------------------------------|------------|---|------------|---|------------|---|------------|---|------------|---|
| Age (weeks)                             | Normal     |   | Saline     |   | Low Dose   |   | Mid Dose   |   | High Dose  |   |
|                                         | Mean ± SD  | N |
| Pre-Infusion                            | 175.8±25.9 | 6 | 129.4±45.7 | 6 | 135.4±46.4 | 3 | 111.6±16.8 | 3 | 98.6±16.8  | 3 |
| 13                                      | 161.0±15.7 | 6 | 122.0±22.3 | 4 | 135.5±10.0 | 3 | 157.2±25.0 | 3 | 119.3±9.0  | 3 |
| 15                                      | 165.6±26.1 | 6 | 129.9±18.6 | 4 | 143.5±10.7 | 3 | 158.0±12.6 | 3 | 148.5±25.5 | 3 |
| 17                                      | 175.6±16.7 | 6 | 114.2±1.5  | 3 | 124.9±14.9 | 3 | 173.0±22.9 | 3 | 156.0±19.2 | 3 |
| 21                                      | 164.6±16.9 | 6 | 125.8±3.5  | 2 | 144.2±45.2 | 3 | 189.9±26.6 | 3 | 156.5±4.9  | 3 |
| 25                                      | 178.5±21.1 | 6 |            |   | 149.0±56.9 | 2 | 278.1±8.4  | 3 | 172.2±10.9 | 3 |
| 29                                      | 177.8±26.8 | 6 |            |   | 170.4±0.0  | 1 | 203.5±16.4 | 3 | 178.6±24.8 | 3 |
| 33                                      | 183.4±21.9 | 6 |            |   | 171.6±0.0  | 1 | 184.7±11.9 | 3 | 193.0±21.0 | 3 |
| 37                                      | 201.8±12.0 | 6 |            |   |            |   | 220.6±10.9 | 3 | 189.0±10.9 | 3 |
| Stride length (cm)                      |            |   |            |   |            |   |            |   |            |   |
| Pre-Infusion                            | 61.6±11.3  | 6 | 48.1±11.0  | 6 | 51.5±6.5   | 3 | 43.1±4.4   | 3 | 37.9±6.6   | 3 |
| 13                                      | 61.5±6.6   | 6 | 52.7±1.6   | 4 | 58.5±10.1  | 3 | 61.4±6.8   | 3 | 50.8±7.7   | 3 |
| 15                                      | 66.7±9.9   | 6 | 54.0±9.8   | 4 | 62.0±10.9  | 3 | 65.1±7.7   | 3 | 59.5±5.5   | 3 |
| 17                                      | 68.5±5.2   | 6 | 51.5±6.6   | 3 | 58.9±5.5   | 3 | 69.4±0.9   | 3 | 64.1±0.7   | 3 |
| 21                                      | 70.3±9.2   | 6 | 55.0±4.9   | 2 | 67.0±23.5  | 3 | 77.9±8.5   | 3 | 67.8±7.1   | 3 |
| 25                                      | 75.0±8.8   | 6 |            |   | 71.6±28.6  | 2 | 76.2±7.8   | 3 | 73.3±8.0   | 3 |
| 29                                      | 74.4±10.0  | 6 |            |   | 75.1±0.0   | 1 | 83.2±9.8   | 3 | 76.1±3.3   | 3 |
| 33                                      | 75.2±9.4   | 6 |            |   | 83.2±0.0   | 1 | 76.9±8.3   | 3 | 78.7±2.0   | 3 |
| 37                                      | 81.3±5.5   | 6 |            |   |            |   | 88.1±6.6   | 3 | 78.5±5.7   | 3 |
| Peak inspiratory flow velocities (mL/s) |            |   |            |   |            |   |            |   |            |   |
| Pre-Infusion                            | 296.6±41.1 | 6 | 247.5±19.3 | 6 | 235.4±41.8 | 3 | 245.6±18.8 | 3 | 266.1±50.4 | 3 |
| 17                                      | 376.5±29.5 | 6 | 271.7±31.4 | 5 | 278.1±34.1 | 3 | 388.6±25.3 | 3 | 465.0±77.6 | 3 |

Supplemental Table 5: Quantification of pathological finding in canine skeletal muscle

| Group/ Timepoint                      | Pathology score        | Average myofiber minFeret diameter | Percent myofibers with mislocalized mitochondria | Percent myofibers with central nuclei | Average number of triads/field |
|---------------------------------------|------------------------|------------------------------------|--------------------------------------------------|---------------------------------------|--------------------------------|
| Normal                                |                        |                                    |                                                  |                                       |                                |
| 10 weeks                              | 0.0±0.0 <sup>†</sup> ¥ | 28.3±0.8                           | 0.0±0.0 <sup>†</sup> ¥                           | 0.1±0.0                               | 5.1±0.6 <sup>†</sup>           |
| 17 weeks                              | 0.0±0.0 <sup>†</sup>   | 37.5±2.3¥                          | 0.2±0.2 <sup>†</sup>                             | 0.2±0.1                               | 6.4±0.6 <sup>†</sup>           |
| 25 weeks                              | 0.0±0.0 <sup>†</sup>   | 43.5±1.9                           | 1.1±0.6                                          | 2.1±1.2                               | 8.2±0.5 <sup>†</sup> ¥         |
| Autopsy                               | 0.0±0.0 <sup>†</sup>   | 37.8±0.5 <sup>†</sup>              | 0.0±0.0                                          | 0.4±0.2 <sup>†</sup>                  | 7.2±0.7 <sup>†</sup>           |
| Saline                                |                        |                                    |                                                  |                                       |                                |
| 10 weeks                              | 3.2±0.3*               | 24.7±4.1                           | 67.3±5.9*                                        | 2.1±0.9                               | 2.5±0.3                        |
| 17 weeks                              | 3.5±0.5*¥              | 29.4±9.8¥                          | 76.4±4.4*¥                                       | 11.4±9.0                              | 2.8±0.5*¥                      |
| 25 weeks                              | 4.5                    | 40.5                               | 92.7                                             | 3.9                                   | 5.4±3.6                        |
| Autopsy                               | 3.9±0.5*¥              | 22.0±4.4**¥                        | 95.4±2.9*¥                                       | 9.1±1.5**¥                            | 1.7±0.2*¥                      |
| Low dose (LD) rAAV8 – cMTM1           |                        |                                    |                                                  |                                       |                                |
| 10 weeks                              | 2.8±0.6*               | 34.7±4.7                           | 59.0±3.2*                                        | 2.9±1.4                               | 3.7±0.6                        |
| 17 weeks                              | 4.2±0.8*¥              | 39.6±1.3                           | 39.4±3.2*¥                                       | 2.1±0.7                               | 3.1±0.7*¥                      |
| 25 weeks                              | 3.6±0.6*¥              | 50.9                               | 13.5                                             | 2.4±1.7                               | 3.6±0.6*¥                      |
| Autopsy                               | 3.8±0.3*¥              | 43.6±5.0 <sup>†</sup>              | 88.8±5.7*¥                                       | 2.9±0.9 <sup>†</sup>                  | 4.4±0.5*¥                      |
| Mid dose (MD) rAAV8 – cMTM1           |                        |                                    |                                                  |                                       |                                |
| 10 weeks                              | 3.8±0.3*               | 30.0±0.7                           | 51.0±7.0*                                        | 1.7±0.3                               | 3.9±0.4                        |
| 17 weeks                              | 1.8±0.8 <sup>†</sup>   | 49.6±1.4* <sup>†</sup>             | 11.5±4.5 <sup>†</sup>                            | 0.8±0.1                               | 5.3±0.7 <sup>†</sup>           |
| 25 weeks                              | 1.7±0.7 <sup>†</sup>   | 48.7±7.5                           | 3.9±3.9                                          | 1.8±1.1                               | 4.1±0.6*¥                      |
| Autopsy                               | 0.8±0.4 <sup>†</sup>   | 52.3±2.4 <sup>†</sup>              | 7.8±1 <sup>†</sup>                               | 1.2±0.5 <sup>†</sup>                  | 8.1±0.7 <sup>†</sup>           |
| High dose (HD) rAAV8 – cMTM1          |                        |                                    |                                                  |                                       |                                |
| 10 weeks                              | 3.0±0.6*               | 19.7±2.2 <sup>†</sup>              | 56.0±16.5*                                       | 3.2±1.5                               | 2.4±0.4                        |
| 17 weeks                              | 1.3±1.0 <sup>†</sup>   | 39.9±3.9                           | 7.5±5.1 <sup>†</sup>                             | 4.7±3.9                               | 7.1±0.5 <sup>†</sup>           |
| 25 weeks                              | 1.3±1.1 <sup>†</sup>   | 38.6±12.6                          | 12.5±10.2                                        | 1.5±1.5                               | 7.8±0.7 <sup>†</sup> ¥         |
| Autopsy                               | 0.8±0.8 <sup>†</sup>   | 45.7±2.8 <sup>†</sup>              | 1.3±1.3 <sup>†</sup>                             | 0.7±0.2 <sup>†</sup>                  | 8.0±0.8 <sup>†</sup>           |
| Symbols                               |                        |                                    |                                                  |                                       |                                |
| * Significantly different from Normal |                        |                                    |                                                  |                                       |                                |
| † Significantly different from Saline |                        |                                    |                                                  |                                       |                                |
| ° Significantly different from LD     |                        |                                    |                                                  |                                       |                                |
| ¥ Significantly different from MD     |                        |                                    |                                                  |                                       |                                |
| & Significantly different from HD     |                        |                                    |                                                  |                                       |                                |

Supplemental Table 6: Vector copy number biodistribution (Vector genomes/ diploid genome (vg/dg))

| Dog Identifier           | Saline  |         |         |         | LD      |         |         | MD      |         |         | HD       |          |          |
|--------------------------|---------|---------|---------|---------|---------|---------|---------|---------|---------|---------|----------|----------|----------|
|                          | SSAN 7  | SSAN 9  | SSAN 13 | SSAN 16 | SSAN 8  | SSAN 11 | SSAN 18 | SSAN 4  | SSAN 10 | SSAN 14 | SSAN 104 | SSAN 106 | SSAN 132 |
| Supraspinatus            | 3.0E-06 | 2.4E-06 | 4.2E-06 | 3.9E-06 | 2.4E-01 | 9.9E-02 | 3.4E-02 | 5.0E-01 | 1.2E+00 | 5.3E-01 | 2.6E+00  | 2.8E-01  | 3.4E+00  |
| Infraspinatus            | 1.6E-04 | 2.5E-06 | 5.6E-05 | 3.2E-06 | 1.8E-01 | 8.8E-02 | 2.0E-02 | 4.8E-01 | 1.3E+00 | 4.1E-01 | 4.0E+00  | 4.5E-01  | 3.4E+00  |
| Deltoidaeus              | 7.6E-04 | 1.8E-06 | 4.0E-06 | 3.3E-06 | 1.3E-01 | 2.0E-01 | 1.2E-01 | 1.3E+00 | 5.9E-01 | 6.2E-01 | 3.1E+00  | 6.0E-01  | 3.1E+00  |
| Triceps brachii          | 1.8E-04 | 2.6E-06 | 3.0E-06 | 3.6E-06 | 8.7E-02 | 2.7E-01 | 4.2E-02 | 8.7E-01 | 7.1E-01 | 6.5E-01 | 1.4E+00  | 7.0E-01  | 3.0E+00  |
| Anconeus                 | 3.6E-06 | 2.8E-06 | 2.7E-06 | 2.7E-06 | 7.2E-02 | 2.5E-01 | 1.2E-01 | 2.1E+00 | 1.0E+00 | 6.0E-01 | 3.6E+00  | 1.3E+00  | 3.0E+00  |
| Flexor carpi ulnaris     | 3.0E-04 | 4.7E-05 | 5.2E-05 | 2.7E-06 | 4.7E-02 | 1.3E-01 | 9.0E-02 | 3.8E-01 | 7.2E-01 | 1.0E+00 | 2.4E+00  | 6.7E-01  | 2.6E+00  |
| Ulnaris lateralis        | 7.4E-05 | 6.6E-05 | 1.4E-04 | 7.4E-05 | 2.7E-01 | 2.0E-01 | 5.9E-02 | 4.7E-01 | 1.3E+00 | 8.5E-01 | 3.0E+00  | 8.6E-01  | 3.1E+00  |
| Ext digit communis       | 2.3E-06 | 1.8E-04 | 3.2E-04 | 3.1E-06 | 1.4E-01 | 1.2E-01 | 9.0E-02 | 1.4E+00 | 9.0E-01 | 4.9E-01 | 3.1E+00  | 6.3E-01  | 2.4E+00  |
| Ext digit lateralis      | 3.4E-06 | 2.7E-06 | 7.1E-05 | 8.4E-05 | 8.6E-02 | 1.7E-01 | 6.3E-02 | 6.2E-01 | 5.8E-01 | 5.3E-01 | 3.0E+00  | 7.0E-01  | 1.6E+00  |
| Ext carpi radialis       | 3.7E-06 | 8.2E-05 | 4.0E-05 | 4.5E-05 | 1.0E-01 | 1.6E-01 | 3.8E-02 | 2.1E+00 | 1.1E+00 | 5.9E-01 | 2.6E+00  | 5.0E-01  | 2.0E+00  |
| Abduct pollicis long     | 7.1E-06 | 2.2E-04 | 3.3E-06 | 9.8E-05 | 6.5E-02 | 8.6E-02 | 1.3E-01 | 4.2E-01 | 1.2E+00 | 8.2E-01 | 3.7E+00  | 4.9E-01  | 1.6E+00  |
| Axillary LN              | 5.5E-06 | 4.1E-06 | 2.6E-06 | 2.7E-06 | 9.1E-03 | 4.1E-02 | 4.3E-02 | 5.6E-01 | 2.2E-01 | 2.0E-01 | 2.3E-01  | 5.8E-02  | 5.9E+00  |
| Brachial plexus          | 2.6E-06 | 2.5E-06 | 0.0E+00 | 3.0E-06 | 1.8E-01 | 4.7E-01 | 4.2E-01 | 1.9E+00 | 2.2E+00 | 2.1E+00 | 7.6E+00  | 3.3E+00  | 4.3E+00  |
| Subscapular LN           | 3.6E-06 | 2.4E-06 | 3.9E-06 | 2.9E-06 | 2.5E-02 | 1.0E-01 | 1.5E+00 | 1.2E-01 | 5.0E-03 | 5.1E-01 | 4.0E-01  | 1.2E-01  | 1.3E+00  |
| Pectoralis               | 3.1E-06 | 2.8E-06 | 1.4E-04 | 3.6E-06 | 3.4E-02 | 2.0E-01 | 8.0E-02 | 2.4E-01 | 8.5E-01 | 5.1E-01 | 1.7E+00  | 5.0E-01  | 2.1E+00  |
| Biceps brachii           | 3.9E-06 | 2.6E-06 | 3.3E-06 | 5.8E-05 | 1.6E-01 | 2.2E-01 | 1.6E-01 | 4.2E-01 | 1.2E+00 | 1.0E+00 | 4.1E+00  | 4.1E-01  | 1.6E+00  |
| Flexor digit superf      | 2.9E-06 | 1.1E-04 | 2.9E-06 | 2.5E-06 | 1.4E-01 | 1.3E-01 | 1.5E-02 | 1.0E+00 | 1.0E+00 | 4.4E-01 | 4.1E+00  | 2.5E-01  | 1.9E+00  |
| Flexor carpi radialis    | 5.5E-04 | 4.4E-05 | 3.2E-06 | 3.1E-06 | 1.4E-01 | 1.2E-01 | 6.1E-02 | 8.5E-01 | 1.2E+00 | 9.8E-01 | 3.8E+00  | 2.6E-01  | 2.4E+00  |
| Flexor digit profundus   | 3.3E-04 | 6.1E-05 | 3.5E-06 | 3.6E-06 | 6.0E-02 | 1.3E-01 | 6.6E-02 | 3.7E-01 | 9.5E-01 | 5.4E-01 | 4.0E+00  | 7.1E-01  | 2.7E+00  |
| Pronator teres           | 3.0E-06 | 8.2E-04 | 1.1E-03 | 1.0E-04 | 1.6E-01 | 1.2E-01 | 1.3E-01 | 7.6E-01 | 1.2E+00 | 4.2E-01 | 1.8E+00  | 6.3E-01  | 2.7E+00  |
| Soleus                   | ND      | ND      | ND      | 2.7E-06 | 9.4E-02 | ND      | 7.5E-02 | 4.4E-01 | 1.2E+00 | 3.8E-01 | 2.6E+00  | 4.0E-01  | 2.6E+00  |
| Supinator                | 5.9E-05 | 2.9E-06 | 7.7E-05 | 1.9E-04 | 9.4E-02 | 2.6E-01 | 3.3E-02 | 1.0E+00 | 5.9E-01 | 2.7E-01 | 2.8E+00  | 4.0E-01  | 2.3E+00  |
| Pronat quadrates         | 2.2E-04 | 5.5E-05 | 3.6E-06 | 3.4E-06 | 7.8E-02 | 2.1E-01 | 1.3E-01 | 3.8E-01 | 1.2E+00 | 4.6E-01 | 3.3E+00  | 6.1E-01  | 2.9E+00  |
| Inguinal LN              | 3.0E-06 | 2.9E-06 | 3.0E-06 | 2.4E-06 | 2.2E-02 | 1.7E-01 | 1.0E-01 | 7.9E-02 | 1.7E-01 | 5.7E-01 | 2.9E-01  | 8.5E-02  | 2.1E-01  |
| Skin                     | 1.6E-06 | 1.2E-03 | 7.5E-05 | 3.0E-04 | 3.2E-01 | 2.4E-01 | 3.0E-01 | 1.9E+00 | 2.4E+00 | 1.1E+00 | 9.7E-01  | 6.8E-01  | 4.1E+00  |
| Biceps femoris           | 3.6E-06 | 4.1E-05 | 1.6E-06 | 2.7E-06 | 2.3E-01 | 1.5E-01 | 1.9E-01 | 8.2E-01 | 1.5E+00 | 1.9E+00 | 3.6E+00  | 6.1E-01  | 2.1E+00  |
| Tibialis cranialis       | 3.5E-06 | 1.2E-04 | 3.0E-06 | 3.1E-06 | 1.5E-01 | 2.4E-01 | 4.8E-02 | 9.2E-01 | 9.5E-01 | 5.7E-01 | 2.7E+00  | 2.4E-01  | 9.0E-01  |
| Vastus lateralis         | 5.5E-05 | 2.5E-06 | 3.5E-06 | 6.2E-05 | 5.8E-02 | 2.4E-01 | 1.7E-01 | 6.3E-01 | 1.1E+00 | 7.7E-01 | 2.5E+00  | 3.9E-01  | 2.7E+00  |
| Ext digito longus        | 3.2E-06 | 2.4E-06 | 2.8E-06 | 3.2E-06 | 5.2E-02 | 2.3E-01 | 1.1E-01 | 5.1E-01 | 9.4E-01 | 3.8E-01 | 2.3E+00  | 2.9E-01  | 1.7E+00  |
| Gastrocnemius            | 9.4E-05 | 3.6E-05 | 1.7E-04 | 2.5E-06 | 1.1E-01 | 1.4E-01 | 6.1E-02 | 3.6E-01 | 8.7E-01 | 9.0E-01 | 4.2E+00  | 9.8E-02  | 2.2E+00  |
| Paravertebral lumbar     | 3.9E-06 | 2.4E-06 | 3.4E-06 | 2.6E-06 | 4.8E-02 | 1.6E-01 | 8.8E-02 | 1.3E+00 | 1.2E+00 | 3.9E-01 | 4.1E+00  | 4.6E-01  | 2.5E+00  |
| Rhomboideus cerv         | 8.2E-04 | 4.0E-05 | 1.4E-04 | 7.7E-05 | 1.0E-01 | 2.1E+00 | 9.0E-02 | 3.6E-01 | 8.1E-01 | 3.3E-01 | 4.8E+00  | 3.2E-01  | 2.4E+00  |
| L thyroid                | 1.3E-04 | ND       | ND       | ND       |
| Submandibular LN         | 8.3E-06 | 4.3E-06 | 8.7E-05 | 4.0E-06 | 2.1E-02 | 4.2E-02 | 3.3E-02 | 4.4E-02 | 5.9E-02 | 2.1E-01 | 3.3E-01  | 5.9E-02  | 2.5E-01  |
| L parotid salivary gland | 3.4E-06 | ND       | ND       | ND       |
| Tongue                   | 5.6E-04 | 1.7E-04 | 1.6E-04 | 2.4E-06 | 1.2E-01 | 4.7E-01 | 1.9E-01 | 7.4E-01 | 1.5E+00 | 7.8E-01 | 2.8E+00  | 9.1E-01  | 2.4E+00  |
| Larynx                   | 4.0E-06 | 2.4E-06 | 6.6E-05 | 9.5E-04 | 1.6E-01 | 3.2E-01 | 1.1E-01 | 1.5E+00 | 9.0E-01 | 1.5E+00 | 5.2E+00  | 5.7E-01  | 2.8E+00  |
| Trachea                  | 2.3E-04 | 3.7E-04 | 2.8E-06 | 2.8E-06 | 2.6E-01 | 4.1E-01 | 1.9E-01 | 1.4E+00 | 1.5E+00 | 1.2E+00 | 6.3E+00  | 1.7E+00  | 4.0E+00  |
| Esophagus                | 3.3E-06 | 2.5E-06 | 2.7E-06 | 2.7E-06 | 2.5E-01 | 5.0E-01 | 2.8E-01 | 2.5E+00 | 1.9E+00 | 1.7E+00 | 6.9E+00  | 1.7E+00  | 2.7E+00  |
| Thymus                   | 3.1E-06 | 2.7E-06 | 2.9E-06 | 2.3E-06 | 1.4E-01 | 2.0E-02 | 1.9E-02 | 1.8E-02 | 6.7E-02 | 8.1E-03 | 3.1E-02  | 4.2E-02  | ND       |





Supplemental Table 7: mRNA levels in XLMTM canine tissues

|                       | Saline  |         | Low dose |         |         | Mid dose |         |         | High dose |          |          |
|-----------------------|---------|---------|----------|---------|---------|----------|---------|---------|-----------|----------|----------|
| Dog Identifier        | SSAN 7  | SSAN 16 | SSAN 8   | SSAN 11 | SSAN 18 | SSAN 4   | SSAN 10 | SSAN 14 | SSAN 104  | SSAN 106 | SSAN 132 |
| Triceps brachii       | 1.1E-07 | 4.0E-08 | 2.7E-04  | 2.7E-04 | 5.0E-04 | 9.2E-04  | 3.4E-03 | 6.5E-03 | 2.9E-02   | 2.8E-03  | 4.0E-02  |
| Biceps brachii        | 4.8E-08 | 5.6E-08 | 4.9E-04  | 1.6E-04 | 1.5E-03 | 1.6E-03  | 3.9E-03 | 1.6E-03 | 4.8E-02   | 2.8E-03  | 2.6E-02  |
| Vastus lateralis      | 4.9E-08 | 1.1E-07 | 4.0E-03  | 4.6E-04 | 4.7E-04 | 6.9E-03  | 5.7E-03 | 6.5E-03 | 3.3E-02   | 1.1E-03  | 8.5E-02  |
| Biceps femoris        | 5.5E-08 | 3.5E-07 | 4.8E-03  | 2.7E-04 | 1.7E-04 | 1.9E-03  | 3.1E-03 | 1.0E-02 | 6.1E-02   | 2.2E-02  | 2.7E-02  |
| Cranial tibialis      | 5.3E-08 | 3.7E-08 | 1.1E-03  | 1.0E-03 | 5.0E-03 | 3.2E-03  | 8.4E-03 | 1.0E-02 | 4.8E-02   | 5.0E-03  | 3.1E-02  |
| Gastrocnemius         | 4.9E-08 | 4.3E-07 | 3.7E-04  | 1.4E-03 | 3.8E-04 | 4.5E-03  | 1.1E-02 | 7.7E-03 | 7.0E-02   | 3.0E-03  | 5.9E-02  |
| Paravertebral lumbar  | 7.5E-08 | 6.2E-08 | 8.8E-04  | 3.3E-04 | 5.0E-03 | 2.4E-03  | 1.4E-02 | 1.6E-03 | 4.0E-02   | 3.3E-03  | 1.3E-02  |
| Intercostal muscle    | 6.8E-08 | 6.0E-08 | 4.9E-04  | 2.1E-04 | 3.2E-03 | 1.3E-03  | 5.6E-03 | 2.1E-03 | 7.7E-02   | 8.1E-03  | 1.2E-02  |
| Diaphragm             | 4.3E-08 | 8.3E-08 | 3.6E-04  | 1.4E-03 | 3.0E-04 | 3.8E-03  | 3.5E-03 | 9.9E-04 | 9.6E-02   | 1.9E-02  | 1.1E-01  |
| Heart right ventricle | 4.9E-08 | 5.5E-08 | 3.1E-04  | 8.9E-04 | 1.8E-03 | 1.9E-03  | 1.4E-02 | 1.2E-03 | 8.4E-02   | 6.2E-03  | 5.4E-02  |
| Heart left ventricle  | 1.0E-07 | 7.2E-08 | 5.0E-04  | 6.9E-05 | 2.2E-03 | 4.5E-03  | 7.7E-03 | 3.0E-03 | 1.2E-01   | 8.6E-03  | 2.5E-01  |
| Heart right atrium    | 5.2E-08 | 2.6E-07 | 6.6E-03  | 5.2E-04 | 2.4E-03 | 7.8E-03  | 4.5E-03 | 1.2E-02 | 6.1E-02   | 1.3E-02  | 1.0E-01  |
| Heart left atrium     | 5.2E-08 | 5.3E-08 | 2.0E-03  | 3.8E-03 | 2.1E-03 | 2.2E-02  | 1.5E-03 | 3.8E-03 | 2.7E-02   | 1.2E-02  | 4.7E-02  |
| Heart papillary       | 5.7E-08 | 5.3E-08 | 3.9E-03  | 1.6E-03 | 2.9E-03 | 1.1E-02  | 2.4E-03 | 4.7E-04 | 6.9E-02   | 3.6E-02  | 1.5E-01  |
| Liver Left lobe       | 1.1E-07 | 1.0E-07 | 2.4E-05  | 2.4E-04 | 1.2E-04 | 7.1E-05  | 1.0E-04 | 9.3E-04 | 6.1E-04   | 5.7E-04  | 2.7E-03  |
| Liver central lobe    | 1.1E-07 | 2.0E-07 | 2.1E-05  | 1.1E-04 | 6.9E-05 | 4.5E-04  | 3.9E-04 | 8.0E-04 | 6.1E-04   | 1.5E-04  | 1.7E-03  |
| Liver right lobe      | 1.1E-07 | 9.9E-08 | 7.5E-06  | 8.0E-05 | 4.0E-05 | 3.4E-04  | 6.4E-04 | 6.4E-04 | 6.2E-04   | 3.8E-04  | 1.9E-03  |
| Lung                  | 5.7E-08 | 8.8E-08 | 1.3E-04  | 1.3E-03 | 5.7E-04 | 8.5E-04  | 2.2E-03 | 1.3E-04 | 8.9E-02   | 1.2E-03  | 1.7E-02  |
| Bladder               | 5.9E-08 | 4.8E-08 | 2.4E-04  | 1.4E-04 | 7.7E-06 | 2.6E-04  | 4.6E-04 | 4.2E-05 | 6.6E-03   | 1.1E-03  | 5.3E-03  |
| Stomach               | 6.0E-08 | 1.3E-06 | 1.3E-04  | 3.1E-05 | 1.7E-05 | 8.2E-05  | 3.1E-04 | 2.5E-04 | 3.7E-02   | 4.2E-04  | 1.3E-03  |
| Spleen                | 2.6E-08 | 5.2E-08 | 5.0E-06  | 1.3E-04 | 3.4E-05 | 2.5E-05  | 2.4E-05 | 9.1E-06 | 1.5E-04   | 1.6E-06  | 1.6E-05  |
| Kidneys               | 4.4E-08 | 3.9E-07 | 4.6E-05  | 6.1E-05 | 3.2E-05 | 2.4E-05  | 1.5E-05 | 5.5E-06 | 2.2E-04   | 5.2E-04  | 5.7E-04  |
| Brain                 | 1.2E-07 | 6.4E-08 | 2.0E-05  | 2.0E-05 | 1.7E-05 | 3.7E-04  | 2.2E-05 | 3.2E-04 | 2.2E-03   | 4.6E-04  | 2.7E-03  |

Supplemental Table 8: Myotubularin protein biodistribution in XLMTM dogs after infusion

| Dog Identifier        | Saline  |         | Low dose |         |         | Mid dose |         |         | High dose |          |          |
|-----------------------|---------|---------|----------|---------|---------|----------|---------|---------|-----------|----------|----------|
|                       | SSAN 7  | SSAN 16 | SSAN 8   | SSAN 11 | SSAN 18 | SSAN 4   | SSAN 10 | SSAN 14 | SSAN 104  | SSAN 106 | SSAN 132 |
| Triceps brachii       | ND      | 5.4E-02 | 3.1E-03  | 9.1E-03 | 3.0E-03 | 3.8E-01  | 7.5E-01 | 5.1E-01 | 1.4E+00   | 5.0E-01  | 4.2E+00  |
| Biceps brachii        | 3.2E-02 | 3.6E-03 | 1.9E-02  | 5.6E-02 | 3.3E-02 | 2.4E-01  | 5.6E-01 | 1.4E-01 | 2.1E+00   | 1.0E-01  | 1.2E+00  |
| Vastus lateralis      | 7.4E-02 | 1.3E-01 | 1.3E-01  | 4.9E-02 | 8.1E-02 | 6.4E-01  | 2.4E-01 | 6.3E-01 | 1.6E+00   | 9.1E-02  | 2.1E+00  |
| Biceps femoris        | 6.1E-02 | 6.9E-03 | ND       | 4.7E-02 | 9.0E-02 | 1.0E-01  | 5.7E-01 | 4.4E-01 | 1.5E+00   | 6.0E-01  | 1.0E+00  |
| Cranial tibialis      | 1.1E-02 | 3.0E-02 | 3.0E-02  | 2.8E-02 | 3.8E-02 | 1.7E-01  | 6.9E-01 | 1.4E-01 | 2.3E+00   | 8.3E-02  | 1.8E-01  |
| Gastrocnemius         | 1.6E-01 | 1.2E-01 | 7.8E-02  | 1.0E-01 | 1.7E-01 | 2.4E-01  | 4.7E-01 | 3.6E-01 | 1.6E+00   | 2.4E-01  | 2.7E+00  |
| Paravertebral lumbar  | 4.3E-02 | 1.4E-02 | 7.0E-03  | 4.0E-02 | 3.7E-02 | 2.8E-01  | 2.5E-01 | 1.7E-01 | 1.9E+00   | 6.4E-02  | 1.6E+00  |
| Intercostal muscle    | 5.9E-02 | 4.3E-02 | 7.4E-02  | 6.2E-02 | 3.6E-02 | 5.6E-02  | 1.4E+00 | 8.0E-02 | 1.0E+00   | 4.0E-01  | 5.4E+00  |
| Diaphragm             | 4.0E-02 | 3.7E-02 | ND       | 2.6E-02 | ND      | 1.6E-01  | 2.6E-01 | ND      | 2.4E+00   | 3.3E-01  | 2.7E+00  |
| Heart right ventricle | 1.2E-01 | 1.3E-01 | 7.0E-02  | 1.2E-01 | 1.4E-01 | 3.2E+00  | 1.1E+00 | 2.6E-01 | 3.5E+00   | 1.3E+00  | 4.0E+00  |
| Heart left ventricle  | 5.8E-01 | 6.5E-01 | 5.5E-01  | 6.2E-01 | 6.9E-01 | 4.1E+00  | 1.6E+00 | 1.3E+00 | 1.9E+00   | 1.1E+00  | 2.0E+01  |
| Heart right atrium    | 6.2E-02 | 2.2E-01 | 2.4E-01  | 3.3E-01 | 2.6E-01 | 3.0E+00  | 3.5E+00 | 9.8E-01 | 3.9E+00   | 3.0E+00  | 3.1E+00  |
| Heart left atrium     | 3.6E-01 | 1.8E-01 | 3.2E-01  | 3.7E-01 | 1.6E-01 | 2.9E+00  | 2.8E+00 | 3.1E+00 | 3.6E+00   | 6.5E-01  | 3.7E+00  |
| Heart papillary       | 2.6E-01 | 1.6E-01 | 2.1E-01  | 2.2E-01 | 2.8E-01 | 5.2E-01  | 5.5E-01 | 6.4E-01 | 1.3E+01   | 2.0E+00  | 2.0E+00  |
| Liver                 | ND      | ND      | 3.2E-01  | 5.8E-01 | 4.5E-01 | 7.0E-02  | 4.6E-02 | 1.1E+00 | 2.1E-01   | 5.4E-01  | 2.5E-01  |
| Lung                  | 4.1E-01 | 5.2E-01 | 2.9E-01  | 2.5E-01 | 3.1E-01 | 2.1E-01  | 1.8E-01 | 4.7E-01 | 3.1E-01   | 2.7E-01  | 6.0E-01  |
| Bladder               | ND      | 7.8E-02 | 5.0E-03  | ND      | 2.0E-03 | ND       | 2.2E-03 | 4.7E-02 | 1.5E-01   | 6.4E-02  | 4.3E-01  |
| Stomach               | 1.3E-01 | ND      | 1.9E-01  | 2.9E-01 | 5.2E-01 | 2.5E-01  | 2.5E-01 | 6.5E-01 | 1.1E-01   | 1.0E+00  | 9.8E-01  |
| Spleen                | 5.4E-02 | 5.8E-02 | 6.8E-01  | ND      | 2.6E-01 | 3.0E-01  | 4.0E-01 | 7.4E-01 | 4.0E-02   | 1.7E-02  | 9.5E-01  |
| Kidneys               | ND      | ND      | 8.3E-02  | ND      | ND      | 2.9E-01  | 2.4E-01 | 1.7E-01 | 2.7E-01   | 3.4E-02  | 2.3E-01  |
| Brain                 | ND      | 1.7E-02 | 5.4E-03  | 2.0E-02 | ND      | 5.3E-02  | 9.7E-02 | 1.1E-01 | 8.1E-02   | 3.5E-02  | 1.3E-01  |

Supplemental Table 9a: M-Mode Echocardiogram Measurements of Study Animals

| SSAN / Gender                                                     | Date(s) of Exam | Age (Weeks) | Weight kg | IVSd cm | LVIDd cm | LVPWd cm | LVIDs cm | EDV ml | ESV ml | EF %  | % FS  |
|-------------------------------------------------------------------|-----------------|-------------|-----------|---------|----------|----------|----------|--------|--------|-------|-------|
| Normal                                                            |                 |             |           |         |          |          |          |        |        |       |       |
| 1 F                                                               | 5/28/13         | 17          | 9.119     | 0.5     | 2.9      | 0.5      | 1.8      | 31     | 9      | 71    | 39    |
|                                                                   | 7/31/13         | 27          | 10.869    | 0.68    | 2.92     | 0.51     | 2.18     | 32.79  | 15.85  | 51.67 | 25.35 |
|                                                                   | 1/23/14         | 52          | 12.619    | 0.64    | 3.17     | 0.5      | 1.87     | 39.89  | 10.67  | 73.26 | 41.04 |
| 3 F                                                               | 5/28/13         | 17          | 7.266     | 0.6     | 2.7      | 0.5      | 1.9      | 27     | 11     | 57    | 29    |
|                                                                   | 7/31/13         | 27          | 8.833     | 0.47    | 3.03     | 0.39     | 2.09     | 35.95  | 14.31  | 60.18 | 30.94 |
|                                                                   | 1/23/14         | 52          | 11.896    | 0.61    | 3.23     | 0.7      | 1.98     | 41.9   | 12.44  | 70.32 | 38.64 |
| 5 F                                                               | 5/28/13         | 18          | 8.191     | 0.7     | 2.9      | 0.6      | 2        | 32     | 12     | 61    | 31    |
|                                                                   | 7/31/13         | 27          | 10.152    | 0.67    | 2.67     | 0.75     | 1.76     | 26.27  | 9.15   | 65.15 | 34.12 |
|                                                                   | 1/23/14         | 52          | 12.472    | 0.82    | 3.04     | 1        | 1.75     | 36.03  | 9.03   | 74.94 | 42.38 |
| 6 M                                                               | 7/31/13         | 18          | 8.213     | 0.53    | 2.37     | 0.65     | 1.09     | 19.52  | 2.63   | 86.54 | 53.79 |
|                                                                   | 10/1/13         | 27          | 10.664    | 0.76    | 2.8      | 0.66     | 1.61     | 29.62  | 7.28   | 75.43 | 42.58 |
|                                                                   | 1/23/14         | 43          | 10.047    | 0.87    | 3.27     | 0.71     | 1.77     | 43.09  | 9.28   | 78.46 | 45.9  |
| 12 M                                                              | 1/23/14         | 38          | 15.32     | 0.64    | 3.36     | 0.85     | 2.21     | 46.19  | 16.47  | 64.33 | 34.15 |
| Saline                                                            |                 |             |           |         |          |          |          |        |        |       |       |
| 7 F                                                               | 5/28/13         | 18          | 6.712     | 0.6     | 2.4      | 0.6      | 1.6      | 20     | 8      | 62    | 32    |
| 9 F                                                               | 5/28/13         | 18          | 5.202     | 0.5     | 3        | 0.6      | 1.9      | 35     | 11     | 68    | 36    |
| 13 F                                                              | 7/31/13         | 17          | 6.7       | 0.55    | 2.54     | 0.59     | 1.41     | 23.23  | 5.17   | 77.75 | 44.42 |
| 101 F                                                             | 5/15/14         | 18          | 6.258     | 0.48    | 2.42     | 0.48     | 1.53     | 20.48  | 6.4    | 68.76 | 36.58 |
| Low Dose                                                          |                 |             |           |         |          |          |          |        |        |       |       |
| 8 M                                                               | 7/30/13         | 18          | 6.478     | 0.56    | 2.34     | 0.51     | 1.43     | 18.91  | 5.38   | 71.54 | 38.71 |
| 11 F                                                              | 5/28/13         | 18          | 7.103     | 0.6     | 2.4      | 0.5      | 1.7      | 21     | 9      | 54    | 28    |
|                                                                   | 7/31/13         | 27          | 6.639     | 0.52    | 2.44     | 0.75     | 1.27     | 21.09  | 3.89   | 45    | 48.11 |
| 18 M                                                              | 1/23/14         | 36          | 15.563    | 0.8     | 3.24     | 0.78     | 2.12     | 42.33  | 14.84  | 64.94 | 34.49 |
| Mid Dose                                                          |                 |             |           |         |          |          |          |        |        |       |       |
| 10 M                                                              | 7/31/13         | 18          | 9.439     | 0.59    | 2.61     | 0.59     | 1.26     | 24.84  | 3.84   | 84.54 | 51.66 |
|                                                                   | 10/1/13         | 27          | 11.911    | 0.74    | 3.03     | 0.75     | 1.75     | 35.93  | 9      | 74.95 | 42.39 |
| 14 M                                                              | 1/23/14         | 38          | 13.076    | 0.74    | 2.97     | 0.69     | 2.06     | 34.19  | 13.71  | 59.9  | 30.69 |
| High Dose                                                         |                 |             |           |         |          |          |          |        |        |       |       |
| 104 M                                                             | 5/15/14         | 18          | 12.498    | 0.59    | 2.46     | 0.65     | 1.49     | 21.47  | 6      | 72.05 | 39.28 |
|                                                                   | 7/18/14         | 27          | 17.65     | 0.79    | 3.14     | 0.54     | 2.13     | 39.04  | 14.97  | 61.65 | 32.04 |
| 106 M                                                             | 5/15/14         | 18          | 8.545     | 0.78    | 2.29     | 0.61     | 1.45     | 17.96  | 5.54   | 69.15 | 36.75 |
|                                                                   | 7/18/14         | 27          | 12.6      | 0.71    | 3.01     | 0.63     | 2        | 35.33  | 12.66  | 64.17 | 33.73 |
| 132 M                                                             | 6/25/14         | 17          | 12.9      | 0.6     | 3.08     | 0.61     | 1.9      | 37.23  | 11.15  | 70.06 | 38.29 |
|                                                                   | 7/18/14         | 21          | 15.5      | 0.72    | 3.26     | 0.75     | 1.84     | 42.95  | 10.3   | 76.01 | 43.58 |
| Abbreviations:                                                    |                 |             |           |         |          |          |          |        |        |       |       |
| F = Female                                                        |                 |             |           |         |          |          |          |        |        |       |       |
| M = Male                                                          |                 |             |           |         |          |          |          |        |        |       |       |
| SSAN =Study Specific Animal Number                                |                 |             |           |         |          |          |          |        |        |       |       |
| IVSd = interventricular septum thickness at end-diastole          |                 |             |           |         |          |          |          |        |        |       |       |
| LVIDd = left ventricular internal dimension at end- diastole      |                 |             |           |         |          |          |          |        |        |       |       |
| LVPWd = left ventricular posterior wall thickness at end-diastole |                 |             |           |         |          |          |          |        |        |       |       |
| LVIDs = left ventricular internal dimension at end-systole        |                 |             |           |         |          |          |          |        |        |       |       |
| EDV = end-diastolic volume of the left ventricle                  |                 |             |           |         |          |          |          |        |        |       |       |
| ESV = end-systolic volume of the left ventricle                   |                 |             |           |         |          |          |          |        |        |       |       |
| EF = ejection fraction                                            |                 |             |           |         |          |          |          |        |        |       |       |
| FS = fractional shortening                                        |                 |             |           |         |          |          |          |        |        |       |       |

Supplemental Table 9b: Doppler Echocardiogram Measurements of Study Animals

| SSAN / Gender                                                                                                | Date(s) of Exam | Age Weeks | MV E Max vel. m/s | MV A Max vel. m/s | MV E/A | e' m/s | MV E/e' |
|--------------------------------------------------------------------------------------------------------------|-----------------|-----------|-------------------|-------------------|--------|--------|---------|
| Normal                                                                                                       |                 |           |                   |                   |        |        |         |
| 1 F                                                                                                          | 5/28/13         | 17        | 0.69              | 0.35              | 1.97   | 0.1    | 6.9     |
|                                                                                                              | 7/31/13         | 27        | 0.72              | 0.47              | 1.53   | 0.07   | 10.29   |
|                                                                                                              | 1/23/14         | 52        | 0.74              | 0.45              | 1.64   | 0.08   | 9.25    |
| 3 F                                                                                                          | 5/28/13         | 17        | 0.54              | 0.34              | 1.59   | 0.06   | 9       |
|                                                                                                              | 7/31/13         | 27        | 0.86              | 0.43              | 2      | 0.08   | 10.75   |
|                                                                                                              | 1/23/14         | 52        | 0.74              | 0.51              | 1.45   | 0.08   | 9.25    |
| 5 F                                                                                                          | 5/28/13         | 18        | 0.81              | 0.48              | 1.69   | 0.07   | 11.57   |
|                                                                                                              | 7/31/13         | 27        | 0.91              | 0.58              | 1.57   | 0.07   | 13      |
|                                                                                                              | 1/23/14         | 52        | 0.94              | 0.85              | 1.11   | 0.08   | 11.75   |
| 6 M                                                                                                          | 7/31/13         | 18        | 1.16              | 0.36              | 3.22   | 0.08   | 14.5    |
|                                                                                                              | 10/1/13         | 27        | 0.99              | 0.48              | 2.06   | 0.1    | 6.6     |
|                                                                                                              | 1/23/14         | 43        | 0.87              | 0.34              | 2.56   | 0.11   | 7.91    |
| 12 M                                                                                                         | 1/23/14         | 38        | 0.74              | 0.31              | 2.39   | 0.14   | 5.29    |
| Saline                                                                                                       |                 |           |                   |                   |        |        |         |
| 7 F                                                                                                          | 5/28/13         | 18        | 0.6               | 0.43              | 1.4    | 0.07   | 8.57    |
| 9 F                                                                                                          | 5/28/13         | 18        | 0.775             | 0.51              | 1.52   | 0.08   | 9.69    |
| 13 F                                                                                                         | 7/31/13         | 17        | 0.93              | 0.53              | 1.75   | 0.07   | 13.29   |
| 101 F                                                                                                        | 5/15/14         | 18        | 0.81              | 0.32              | 2.53   | 0.11   | 7.36    |
| Low Dose                                                                                                     |                 |           |                   |                   |        |        |         |
| 8 M                                                                                                          | 7/30/13         | 18        | 0.79              | 0.42              | 1.88   | 0.06   | 13.17   |
| 11 F                                                                                                         | 5/28/13         | 18        | 0.82              | 0.36              | 2.28   | 0.07   | 11.71   |
|                                                                                                              | 7/31/13         | 27        | 0.79              | 0.43              | 1.84   | 0.07   | 11.29   |
| 18 M                                                                                                         | 1/23/14         | 36        | 0.65              | 0.36              | 1.81   | 0.11   | 5.91    |
| Mid Dose                                                                                                     |                 |           |                   |                   |        |        |         |
| 10 M                                                                                                         | 7/31/13         | 18        | 0.96              | 0.45              | 2.13   | 0.09   | 10.67   |
|                                                                                                              | 10/1/13         | 27        | 0.95              | 0.53              | 1.79   | 0.09   | 8.33    |
| 14 M                                                                                                         | 1/23/14         | 38        | 0.76              | 0.43              | 1.77   | 0.2    | 3.8     |
| High Dose                                                                                                    |                 |           |                   |                   |        |        |         |
| 104 M                                                                                                        | 5/15/14         | 18        | 1.14              | 0.29              | 3.93   | 0.1    | 11.4    |
|                                                                                                              | 7/18/14         | 27        | 0.87              | 0.4               | 2.18   | 0.11   | 7.91    |
| 106 M                                                                                                        | 5/15/14         | 18        | 0.77              | 0.33              | 2.33   | 0.1    | 7.7     |
|                                                                                                              | 7/18/14         | 27        | 0.88              | 0.54              | 1.63   | 0.09   | 9.78    |
| 132 M                                                                                                        | 6/25/14         | 17        | 0.96              | 0.64              | 1.5    | 0.08   | 12      |
|                                                                                                              | 7/18/14         | 21        | 0.87              | 0.5               | 1.74   | 0.08   | 10.88   |
| MV E = early filling velocity<br>MV A = active filling velocity<br>e' =tissue velocity of the mitral annulus |                 |           |                   |                   |        |        |         |

Supplemental Table 9c: Doppler Echocardiogram Measurements of Study Animals

| SSAN / Gender                                                                                                                                                                                                                                                             | Date(s) of Exam | Age weeks | AV Max | LVOT Max m/s | LVOT VTI | IVRT ms | PV Max m/s | PV Accl Time | PV ET ms | PAT/ET | TR Max Vel. m/s | TR max PG mm/Hg |
|---------------------------------------------------------------------------------------------------------------------------------------------------------------------------------------------------------------------------------------------------------------------------|-----------------|-----------|--------|--------------|----------|---------|------------|--------------|----------|--------|-----------------|-----------------|
| Normal                                                                                                                                                                                                                                                                    |                 |           |        |              |          |         |            |              |          |        |                 |                 |
| 1 F                                                                                                                                                                                                                                                                       | 5/28/13         | 17        | 1.1    | 0.86         | 8.82     | 39.9    | 0.83       | 50.35        | 148.2    | 0.34   | none            |                 |
|                                                                                                                                                                                                                                                                           | 7/31/13         | 27        | 1.3    | 1.06         | 11.43    | 42.8    | 1.06       | 98.91        | 187.4    | 0.53   | 2.58            | 26.62           |
|                                                                                                                                                                                                                                                                           | 1/23/14         | 52        | 1.3    | 1            | 12.39    | 38.04   | 0.99       | 79.89        | 206.4    | 0.39   | 2.72            | 29.68           |
| 3 F                                                                                                                                                                                                                                                                       | 5/28/13         | 17        | 0.7    | 0.69         | 7.95     | 51.3    | 0.81       | 79.8         | 191      | 0.42   | none            |                 |
|                                                                                                                                                                                                                                                                           | 7/31/13         | 27        | 1      | 0.93         | 11.55    | 43.75   | 0.94       | 53.26        | 201.6    | 0.26   | none            |                 |
|                                                                                                                                                                                                                                                                           | 1/23/14         | 52        | 1.1    | 0.81         | 8.88     | ns      | 1.94       | 89.4         | 182.6    | 0.49   | none            |                 |
| 5 F                                                                                                                                                                                                                                                                       | 5/28/13         | 18        | 1.2    | 0.98         | 10.73    | 49.4    | ns         | ns           | ns       | ns     | none            |                 |
|                                                                                                                                                                                                                                                                           | 7/31/13         | 27        | 1.5    | 1.15         | 12.23    | 40.89   | 1.29       | 51.36        | 204.5    | 0.25   | 2.68            | 28.71           |
|                                                                                                                                                                                                                                                                           | 1/23/14         | 52        | 1.2    | 1.15         | 14.08    | 46.65   | 1.37       | 66.57        | 191.2    | 0.35   | 2.39            | 29.68           |
| 6 M                                                                                                                                                                                                                                                                       | 7/31/13         | 18        | 1.4    | 0.99         | 10.95    | 35.19   | 1.24       | 82.74        | 197.8    | 0.42   | none            |                 |
|                                                                                                                                                                                                                                                                           | 10/1/13         | 27        | 1.5    | 1.25         | 13.95    | 36.14   | 0.89       | 79.89        | 156.9    | 0.51   | none            |                 |
|                                                                                                                                                                                                                                                                           | 1/23/14         | 43        | 1.2    | 1.11         | 11.91    | 39.94   | ns         | 79.89        | 194      | 0.41   | none            |                 |
| 12 M                                                                                                                                                                                                                                                                      | 1/23/14         | 38        | 1.6    | 1.44         | 16.4     | 58.01   | ns         | 87.49        | 195.9    | 0.45   | 2.73            | 29.81           |
| Saline                                                                                                                                                                                                                                                                    |                 |           |        |              |          |         |            |              |          |        |                 |                 |
| 7 F                                                                                                                                                                                                                                                                       | 5/28/13         | 18        | 1.2    | 1.14         | 7.57     | 29.45   | 0.94       | 58.9         | 149.2    | 0.39   | none            |                 |
| 9 F                                                                                                                                                                                                                                                                       | 5/28/13         | 18        | 0.9    | 0.76         | 7.73     | 42.75   | 0.96       | 91.2         | 171      | 0.53   | none            |                 |
| 13 F                                                                                                                                                                                                                                                                      | 7/31/13         | 17        | 1.2    | 0.9          | 10.08    | ns      | 0.83       | 61.82        | 186.4    | 0.33   | none            |                 |
| 101 F                                                                                                                                                                                                                                                                     | 5/15/14         | 18        | 1      | 0.78         | 9.15     | ns      | 1.08       | 75.13        | 175      | 0.43   | none            |                 |
| Low Dose                                                                                                                                                                                                                                                                  |                 |           |        |              |          |         |            |              |          |        |                 |                 |
| 8 M                                                                                                                                                                                                                                                                       | 7/30/13         | 18        | 1      | 0.81         | 8.55     | 37.09   | 1.38       | 47.55        | 180.7    | 0.26   | none            |                 |
| 11 F                                                                                                                                                                                                                                                                      | 5/28/13         | 18        | 1.3    | 1.42         | 10.45    | 31.35   | 1          | 72.2         | 173.9    | 0.42   | none            |                 |
|                                                                                                                                                                                                                                                                           | 7/31/13         | 27        | 1.4    | 1.23         | 12.2     | 47.55   | ns         | ns           | ns       | ns     | none            |                 |
| 18 M                                                                                                                                                                                                                                                                      | 1/23/14         | 36        | 1.1    | 1.07         | 12.48    | 47.55   | 1.21       | 96.05        | 180.7    | 0.53   | none            |                 |
| Mid Dose                                                                                                                                                                                                                                                                  |                 |           |        |              |          |         |            |              |          |        |                 |                 |
| 10 M                                                                                                                                                                                                                                                                      | 7/31/13         | 18        | 1.5    | 0.92         | 10.39    | 44.7    | 1.48       | 72.28        | 180.7    | 0.4    | none            |                 |
|                                                                                                                                                                                                                                                                           | 10/1/13         | 27        | 1.1    | 0.84         | 10.76    | 39.94   | 1.48       | 77.98        | 174      | 0.45   | none            |                 |
| 14 M                                                                                                                                                                                                                                                                      | 1/23/14         | 38        | 1.2    | 0.96         | 11.2     | 43.75   | 1.1        | 74.18        | 175.9    | 0.42   | none            |                 |
| High Dose                                                                                                                                                                                                                                                                 |                 |           |        |              |          |         |            |              |          |        |                 |                 |
| 104 M                                                                                                                                                                                                                                                                     | 5/15/14         | 18        | 1.2    | 0.99         | 10.48    | ns      | 0.76       | 84.64        | 180.7    | 0.47   | none            |                 |
|                                                                                                                                                                                                                                                                           | 7/18/14         | 27        | 1.2    | 1.13         | 11.01    | ns      | 1.25       | 87.49        | 207.3    | 0.42   | none            |                 |
| 106 M                                                                                                                                                                                                                                                                     | 5/15/14         | 18        | 1.3    | 1.26         | 12.72    | ns      | 1.33       | 62.77        | 170.2    | 0.37   | none            |                 |
|                                                                                                                                                                                                                                                                           | 7/18/14         | 27        | 1.2    | 1.13         | 11.01    | ns      | 1.25       | 87.49        | 207.3    | 0.42   | none            |                 |
| 132 M                                                                                                                                                                                                                                                                     | 6/25/14         | 17        | 1.5    | 0.95         | 10.11    | 48.5    | 1.42       | 65.62        | 156      | 0.42   | none            |                 |
|                                                                                                                                                                                                                                                                           | 7/18/14         | 21        | 1.3    | 1.19         | 13.16    | ns      | 1.28       | ns           | ns       | ns     | 2.4             | 23.03           |
| ns= not seen<br>AV max = Aortic valve velocity<br>LVOT = left ventricular outflow tract velocity<br>IVRT = isovolumic relaxation time<br>PV = pulmonic valve<br>ET = ejection time<br>TR = tricuspid regurgitation velocity<br>PG = pressure gradient<br>ms = millisecond |                 |           |        |              |          |         |            |              |          |        |                 |                 |
